# Supplementary material
Source: PubMed Central journal article supplement (PMC4307034)
Supplement: Supp_Fig1.pdf [file Supp_Fig1.pdf]

## Supplementary Data

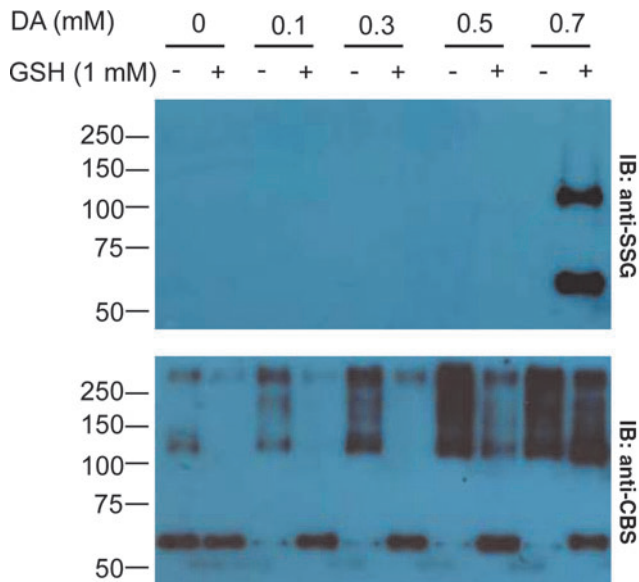

**SUPPLEMENTARY FIG. S1. Effect of the diamide concentration on S-glutathionylation of CBS.** Purified recombinant CBS (0.5 mg/ml) was incubated with various concentrations of DA along with 1 mM GSH as indicated. The protein samples (20 ng) were separated by nonreducing SDS-PAGE followed by Western blot analysis using anti-SSG antibody (*top*) or anti-CBS antibody (*bottom*). Molecular masses of protein standards in kDa are shown on the *left*. CBS, cystathionine  $\beta$ -synthase; DA, diamide; GSH, glutathione; SDS-PAGE, sodium dodecyl sulfate–polyacrylamide gel electrophoresis.
