# Supplementary material
Source: PubMed Central journal article supplement (PMC4307034)
Supplement: Supp_Fig2.pdf [file Supp_Fig2.pdf]

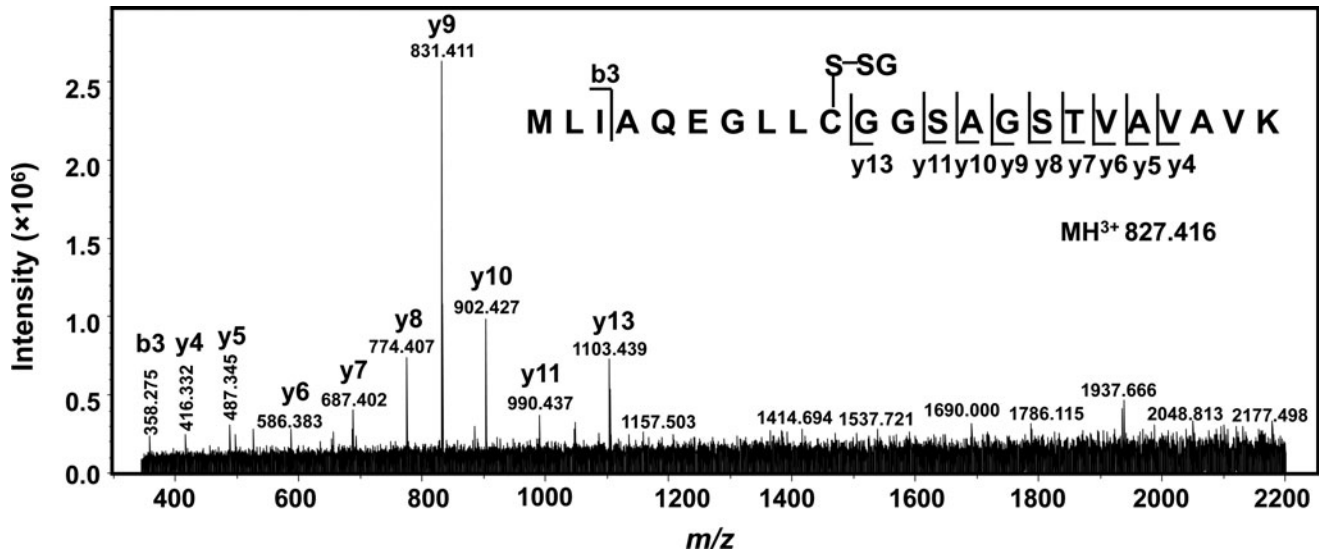

**SUPPLEMENTARY FIG. S2. LC-MS/MS analysis of the tryptic peptide containing Cys346 in glutathionylated CBS.** CBS ( $100 \mu M$ ) was treated with  $2 \text{ mM}$  diamide and  $3 \text{ mM}$  GSH for 30 min at room temperature and then denatured with  $6 \text{ M}$  guanidine hydrochloride. Free thiol groups were derivatized with  $10 \text{ mM}$  iodoacetamide, followed by tryptic digestion for LC-MS/MS analysis. The treated peptide ( $M + 3H$ ) $^{3+}$  with a mass/charge ratio ( $m/z$ ) of 827.416 (shown in Fig. 4b) corresponds to the CBS modified by glutathionylation at Cys346. LC-MS/MS, liquid chromatography–tandem mass spectrometry.
